# Supplementary material for: A Specialized Peptidoglycan Synthase Promotes Salmonella Cell Division inside Host Cells
Source: PubMed Central journal article supplement (PMC5736910; doi:10.1128/mbio.01685-17), 2017-12-19
Supplement: mbo006173650sf1.pdf [file mbo006173650sf1.pdf]

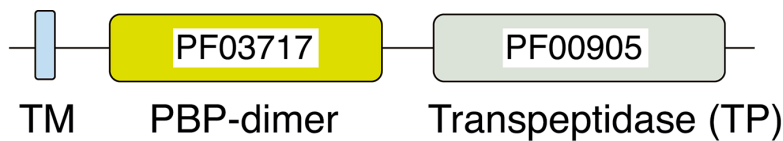

*S. Typhimurium* PBP3<sup>SAL</sup> 1  
*S. Typhimurium* PBP3 1  
*E. coli* PBP3 1

```

.....MKKKS DGDTRNF TP IRFALLC TA ILLS MAL LLGRV AWLQIVT P SKLVK QEDMR
MKA AAKTQ KSKR ROE E Q T N F I S W R F A L L C G C I L L A L V F L L G R A A W L Q I I A P D M L V R Q Q D M R
MKA AAKTQ KSKR ROE E H A N F I S W R F A L L C G C I L L A L A F L L G R V A W L Q I V T P S K L V K Q E D M R
    
```

TM

```

54 SLR E V T T A S P R G M I T D R E G R P L A V S V P V N A V W A D P K I T I S K G G V G Y N E R W Q A L A S A L H L S
61 SLR V Q E V S T S R G M I T D R S G R P L A V S V P V K A I W A D P K E V H D A G G E S V G D R W K A L S T A L N I P
61 SLR V Q Q V S T S R G M I T D R S G R P L A V S V P V K A I W A D P K E V H D A G G E S V G D R W K A L A N A L N I P
    
```

*S. Typhimurium* PBP3<sup>SAL</sup> 114  
*S. Typhimurium* PBP3 121  
*E. coli* PBP3 121

```

L S T L A E R V N S N P A G R F I Y L A R Q V S P Q Q A E W I D K L N L P G I N L R E E S R R Y P A G H V A A N L I G
L D Q L S A R I N A N P K G R F I Y L A R Q V N P D M A Y I K K L K L P G I H L R E E S R R Y P S G E V T A H L I G
L D Q L S A R I N A N P K G R F I Y L A R Q V N P D M A Y I K K L K L P G I H L R E E S R R Y P S G E V T A H L I G
    
```

PBP-dimer

```

174 F T N I D G O G I E G I E K S F N A O L T G K P G S R L V R K D K F G H V I E N I T E V N P V P A H E L Q L S I D E R L
181 F T N V D S O G I E G V E K S F D K W L T G Q P G E R I V R K D R Y G R V I E D I S S D S Q A A H N L A L S I D E R L
181 F T N V D S O G I E G V E K S F D K W L T G Q P G E R I V R K D R Y G R V I E D I S S D S Q A A H N L A L S I D E R L
    
```

*S. Typhimurium* PBP3<sup>SAL</sup> 234  
*S. Typhimurium* PBP3 241  
*E. coli* PBP3 241

```

Q T V T E D A L D N A V I W N K A E S G A A V L I N I P T G E I L S M A S Y P D F N P N N R E G A Q L D D F R N R A I S
Q A L V Y R E L N N A V A F N K A E S G S A V L V D V N T G E V L A M A N S P S Y N P N N L A G T P K D A M R N R I T I T
Q A L V Y R E L N N A V A F N K A E S G S A V L V D V N T G E V L A M A N S P S Y N P N N L S G T P K E A M R N R I T I T
    
```

SXXK      SXN/D

```

294 D T F E P G S T V K P L V I M T A L O Q G I V Q P D S V I D T H P T L D G H R I R D V G Y P E L T L T C H L O K S S
301 D V F E P G S T V K P M V V M T A L O R G I V N E N T V L N T V P Y R I N G H E I K D V A R Y S E L T L T C V L O K S S
301 D V F E P G S T V K P M V V M T A L O R G V V R E N S V L N T I P R I N G H E I K D V A R Y S E L T L T G V L O K S S
    
```

Transpeptidase (TP)

*S. Typhimurium* PBP3<sup>SAL</sup> 354  
*S. Typhimurium* PBP3 361  
*E. coli* PBP3 361

```

D T G V S H L S L A M P V Q K L M D T Y K S F G F G V P T C L G L T G E S S G I L P K R R Y W S D L D R A T F S F G Y G
N V G V S K L A L A M P S S A L V D T Y S R F C L G K A N L L G L V G E R S G I Y P Q K Q R W S D I E R A T F S F G Y G
N V G V S K L A L A M P S S A L V D T Y S R F C L G K A N L L G L V G E R S G I Y P Q K Q R W S D I E R A T F S F G Y G
    
```

```

414 L M V T P L Q L A H V Y A T I G S F G I Y R P L S I T K V D P P V I T G T R V M P E E L V H E V E H M M E S V A L P G G G
421 L M V T P L Q L A R V Y A T I G S Y G I Y R P L S I T K V D P P V P G E R I F P E S T V R T V H M M E S V A L P G G G
421 L M V T P L Q L A R V Y A T I G S Y G I Y R P L S I T K V D P P V P G E R V F P E S I V R T V H M M E S V A L P G G G
    
```

KTG

*S. Typhimurium* PBP3<sup>SAL</sup> 474  
*S. Typhimurium* PBP3 481  
*E. coli* PBP3 481

```

G T K A A V R D Y R I A V K T G T A K K I C D C K Y V D K Y V A Y T A G V A P A S N P R F A L V V V I N P O N G A Y
G V K A A I K G Y R I A I K T G T A K K V G P D G R Y I N K Y I A Y T A G V A P A S Q P R F A L V V V I N D P O A G R Y
G V K A A I K G Y R I A I K T G T A K K V G P D G R Y I N K Y I A Y T A G V A P A S Q P R F A L V V V I N D P O A G R Y
    
```

```

534 Y G G A V S A P V E S Q I M C D V L R L E N V E P D G M P A D S D H L L V M H G S H V A P V G S
541 Y G G A V S A P V E G A I M C G V L R T M N I E P D A L A T G E K N E F V I N Q G E G T G G R S
541 Y G G A V S A P V E G A I M C G V L R T M N I E P D A L I T T G D K N E F V I N Q G E G T G G R S
    
```
