# Supplementary material for: A Specialized Peptidoglycan Synthase Promotes Salmonella Cell Division inside Host Cells
Source: PubMed Central journal article supplement (PMC5736910; doi:10.1128/mbio.01685-17), 2017-12-19

FIG S2. Castanheira et al.

A

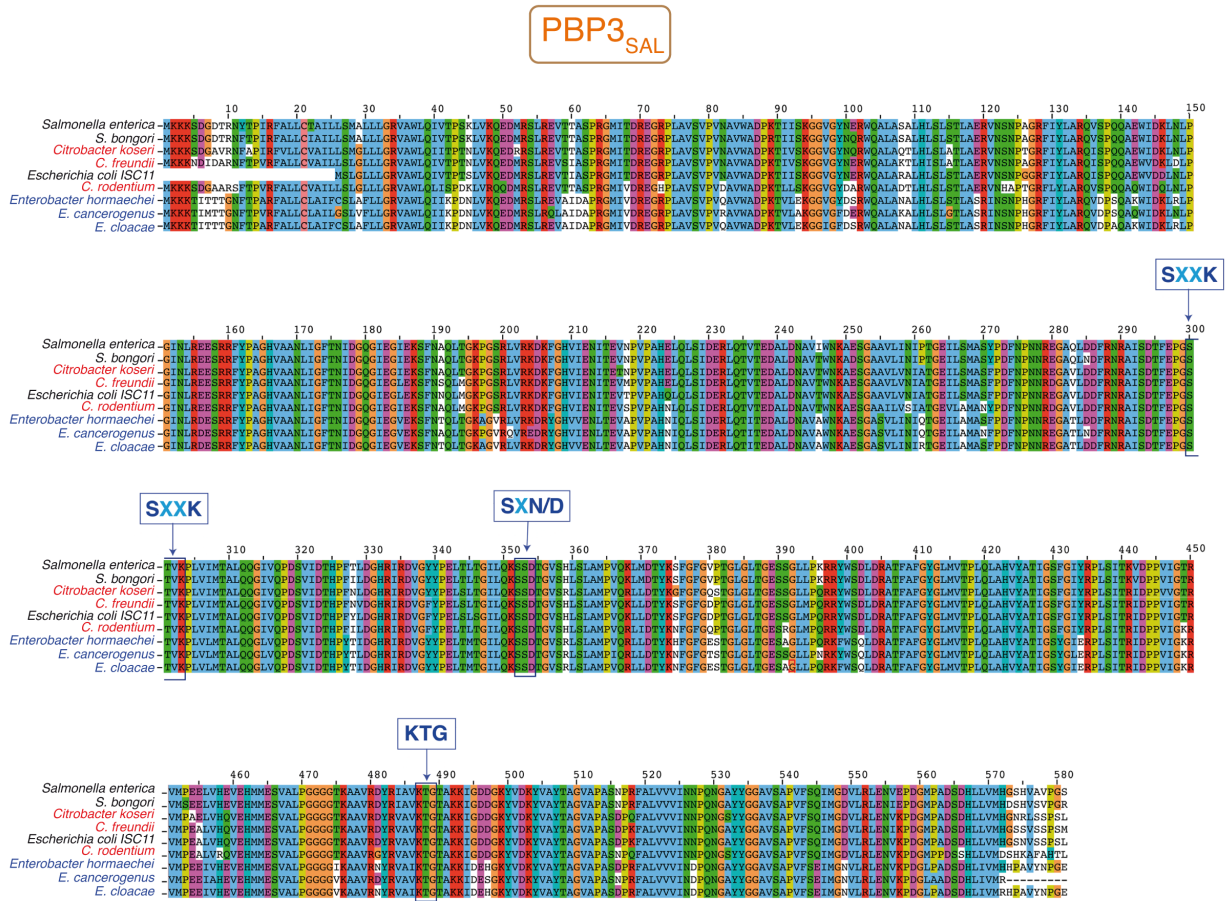

B

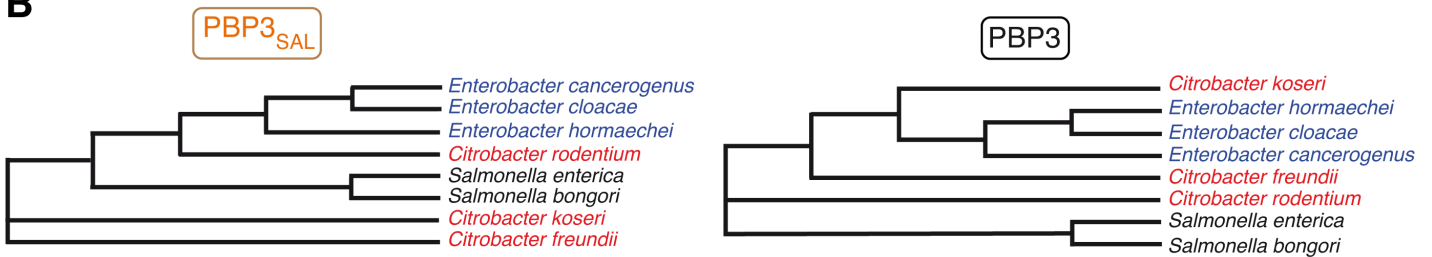

Supplement: mbo006173650sf2.pdf [file mbo006173650sf2.pdf]
