# Supplementary material for: A Specialized Peptidoglycan Synthase Promotes Salmonella Cell Division inside Host Cells
Source: PubMed Central journal article supplement (PMC5736910; doi:10.1128/mbio.01685-17), 2017-12-19
Supplement: mbo006173650st1.pdf [file mbo006173650st1.pdf]

**Table S1.** Single-nucleotide polymorphisms (SNP) resulting in non-synonymous mutations identified by whole-genome sequencing (WGS) in the  $\Delta ftsI$  null mutants and the  $ftsI^+$  segregant used in this study. (\*)

| Coordinate<br>SNP(**) | Locus ID              | Protein                               | Nucleotide/strain (†)     |                          |                                      |                                      |                              | Effect     |
|-----------------------|-----------------------|---------------------------------------|---------------------------|--------------------------|--------------------------------------|--------------------------------------|------------------------------|------------|
|                       |                       |                                       | SL1344<br>( <i>hisG</i> ) | SV5015<br>(SL1344, His+) | MD4356<br>(SV5015, $\Delta ftsI-1$ ) | MD4357<br>(SV5015, $\Delta ftsI-2$ ) | MD4358<br>(SV5015, $ftsI+$ ) |            |
| 635606                | <i>SL1344_RS02730</i> | PTS mannose transporter subunit IIAB  | A                         | T                        | T                                    | T                                    | T                            | Glu95Val   |
| 2135472               | <i>SL1344_RS10615</i> | Thiosulphate reductase cytochrome B   | G                         | T                        | T                                    | T                                    | T                            | Gly110Val  |
| 2147535               | <i>SL1344_RS10655</i> | ATP phosphoribosyltransferase (HisG)  | C                         | T                        | T                                    | T                                    | T                            | Pro69Leu   |
| 600714                | <i>SL1344_RS02730</i> | Putative outer membrane protein       | G                         | G                        | C                                    | C                                    | C                            | Val55Leu   |
| 2909450               | <i>SL1344_RS14215</i> | Predicted ATP-binding protein         | A                         | A                        | -                                    | A                                    | A                            | Leu278STOP |
| 3565837               | <i>SL1344_RS17425</i> | Rod-shape determining protein MreB    | C                         | C                        | C                                    | T                                    | T                            | Ser48Leu   |
| 4606941               | <i>SL1344_RS22305</i> | PoxA, regulator pyruvate oxidase PoxB | G                         | G                        | G                                    | C                                    | C                            | Cys89Tyr   |

(\*) WGS confirmed endpoints of the  $\Delta ftsI$  deletion in coordinates 141805-143342.

(\*\*) Accession used for the SL1344 reference genome was GenBank: FQ312003.1.

(†) Strain SV5015 is the prototrophic His<sup>+</sup> strain used as wild-type in this study. SV5015 was generated from the auxotrophic strain SL1344 by phage transduction (Vivero et al., 2008) and was also sequenced by WGS in this study. Strain MD4358 (SV5015,  $ftsI^+$ ) refers to a  $ftsI^+$  segregant obtained from the merodiploid strain MD4805 ( $ftsI^+/\Delta ftsI$ ).
