# Supplementary material for: A Specialized Peptidoglycan Synthase Promotes Salmonella Cell Division inside Host Cells
Source: PubMed Central journal article supplement (PMC5736910; doi:10.1128/mbio.01685-17), 2017-12-19
Supplement: mbo006173650st2.pdf [file mbo006173650st2.pdf]

**Table S2.** Antibiotic susceptibility profile of *S. Typhimurium* strains lacking PBP3 or PBP3<sub>SAL</sub> (\*)

| Antibiotic (†) | Strain |                        |                              |
|----------------|--------|------------------------|------------------------------|
|                | WT     | $\Delta$ <i>ftsI-1</i> | $\Delta$ PBP3 <sub>SAL</sub> |
| Ampicillin     | 0.75   | 1                      | 1                            |
| Aztreonam      | 0.094  | 0.75                   | 0.094                        |
| Cefalotin      | 4      | 8                      | 8                            |
| Cefepime       | 0.19   | 0.19                   | 0.19                         |
| Cefoxitin      | 2      | 6                      | 4                            |
| Ceftazidime    | 0.75   | 0.125                  | 0.38                         |
| Cefuroxime     | 8      | 48                     | 12                           |
| Imipenem       | 0.19   | 0.125                  | 0.125                        |
| Meropenem      | 0.023  | 0.016                  | 0.032                        |
| Piperacillin   | 1.5    | 3                      | 1.5                          |
| Kanamycin      | 4      | 6                      | 4                            |
| Ciprofloxacin  | 0.023  | 0.064                  | 0.032                        |

(\*) Indicated are values of minimal inhibitory concentration (MIC) ( $\mu\text{g ml}^{-1}$ ) of a representative experiment from a total of two independent E-test assays with essentially identical results.

(†) Kanamycin and ciprofloxacin were used as control non-beta-lactam antibiotics
