# Supplementary material for: A Specialized Peptidoglycan Synthase Promotes Salmonella Cell Division inside Host Cells
Source: PubMed Central journal article supplement (PMC5736910; doi:10.1128/mbio.01685-17), 2017-12-19
Supplement: mbo006173650st3.pdf [file mbo006173650st3.pdf]

**Table S3.** *S. Typhimurium/E. coli* strains and plasmids used in this study

| Bacterial strain/ plasmid | Relevant genotype                                                                                  | Source/ reference                        |
|---------------------------|----------------------------------------------------------------------------------------------------|------------------------------------------|
| <i>E. coli</i>            |                                                                                                    |                                          |
| MC6RP1                    | K-12, F <sup>-</sup> , <i>thrA leuA proA dra drm lysA</i>                                          | (García-del Portillo and de Pedro, 1990) |
| RP41                      | MC6RP1, <i>leu</i> <sup>+</sup> , <i>ftsI (ts)</i>                                                 | (García-del Portillo and de Pedro, 1990) |
| MD4464                    | RP41 pAC                                                                                           | This study                               |
| MD4465                    | RP41 pAC:: <i>STM1836</i>                                                                          | This study                               |
| MD4471                    | RP41 pAC:: <i>ftsI</i>                                                                             | This study                               |
| MD5005                    | RP41 pAC-6x <i>HIS</i>                                                                             | This study                               |
| MD5006                    | RP41 pAC-6x <i>HIS-STM1836</i>                                                                     | This study                               |
| MD5008                    | RP41 pAC- <i>ftsI-6xHIS</i>                                                                        | This study                               |
| <i>S. Typhimurium</i>     |                                                                                                    |                                          |
| SL1344                    | <i>hisG64</i> , virulent strain                                                                    | (Hoiseh and Stocker, 1981)               |
| SV5015                    | SL1344, <i>hisG</i> <sup>+</sup>                                                                   | (Vivero et al., 2008)                    |
| SV1604                    | LT2 (Dup [ <i>thr-469*MudP*proA692</i> ])                                                          | (Camacho and Casadesus, 2001)            |
| MD4348                    | SV5015 (Dup [ <i>thr-469*MudP*proA692</i> ])                                                       | This study                               |
| MD4802                    | SV5015 (Dup [ <i>thr-469*MudP*proA692</i> ]) <i>ftsI</i> <sup>+</sup> / $\Delta$ <i>ftsI</i> ::kan | This study                               |
| MD4805                    | SV5015 (Dup [ <i>thr-469*MudP*proA692</i> ]) <i>ftsI</i> <sup>+</sup> / $\Delta$ <i>ftsI</i>       | This study                               |
| MD2502                    | SV5015 $\Delta$ <i>STM1836</i> ::kan                                                               | This study                               |
| MD2559                    | SV5015 <i>STM1836</i> ::3xFLAG-kan                                                                 | This study                               |
| MD3842                    | SV5015 <i>STM1836</i> ::3xFLAG-kan <i>ompR1009</i> ::Tn10                                          | This study                               |
| MD3895                    | SV5015 <i>STM1836</i> ::3xFLAG-kan <i>slyA</i> ::pRR10 $\Delta$ <i>trfA</i> Pen <sup>R</sup>       | This study                               |

|        |                                                                        |            |
|--------|------------------------------------------------------------------------|------------|
| MD3897 | SV5015 <i>STM1836::3xFLAG-kan phoP7953::Tn10</i>                       | This study |
| MD4356 | SV5015 $\Delta$ <i>ftsI-1</i> (segregant, clone 1)                     | This study |
| MD4357 | SV5015 $\Delta$ <i>ftsI-2</i> (segregant, clone 2)                     | This study |
| MD4358 | SV5015 <i>ftsI</i> <sup>+</sup> (segregant)                            | This study |
| MD4360 | SV5015 $\Delta$ <i>ftsI-1 STM1836::3xFLAG-kan</i>                      | This study |
| MD4361 | SV5015 <i>ftsI</i> <sup>+</sup> (segregant) <i>STM1836::3xFLAG-kan</i> | This study |
| MD4366 | SV5015 $\Delta$ <i>ftsI-1</i> pAC- <i>ftsI</i> <sup>+</sup>            | This study |
| MD5023 | SV5015 $\Delta$ <i>ftsI-1</i> pSEVA 237R                               | This study |
| MD5024 | SV5015 $\Delta$ <i>ftsI-1</i> pAC-6xHIS- <i>STM1836</i>                | This study |
| MD5026 | SV5015 pSEVA 237R                                                      | This study |

---

Plasmids

|            |                                                              |                                    |
|------------|--------------------------------------------------------------|------------------------------------|
| pKD13      | Kan <sup>R</sup> , Amp <sup>R</sup>                          | (Datsenko and Wanner, 2000)        |
| pKD46      | $\gamma$ , $\beta$ , exo. Amp <sup>R</sup>                   | (Datsenko and Wanner, 2000)        |
| pSUB11     | 3xFLAG sequence, Kan <sup>R</sup>                            | (Uzzau et al., 2001)               |
| pCP20      | <i>FLP</i> <sup>+</sup> , Amp <sup>R</sup> , Cm <sup>R</sup> | (Cherepanov and Wackernagel, 1995) |
| pAC        | Cm <sup>R</sup>                                              | (Lobato-Marquez et al., 2015)      |
| pAC-HIS    | Cm <sup>R</sup>                                              | (Lobato-Marquez et al., 2015)      |
| pSEVA 237R | Kan <sup>R</sup>                                             | (Silva-Rocha et al., 2013)         |

---
