# Supplementary material for: A Specialized Peptidoglycan Synthase Promotes Salmonella Cell Division inside Host Cells
Source: PubMed Central journal article supplement (PMC5736910; doi:10.1128/mbio.01685-17), 2017-12-19
Supplement: mbo006173650st4.pdf [file mbo006173650st4.pdf]

**Table S4.** Oligonucleotide primers used in this study

| <b>Primer</b>    | <b>Sequence (5'-3')</b>                                                         |
|------------------|---------------------------------------------------------------------------------|
| fwSpeI-PBP3      | CGCTACTAGTATGAAAGCAGCGGCAAAAACGCAA                                              |
| revSpeI-PBP3     | CCCTACTAGTTTACGATCTGCCACCTGTTCCTCG                                              |
| fwSpeI-PBP3*     | CGCTACTAGTGTGAAAAAGAAAAGCGACGGCGATA                                             |
| revPvuI-PBP3*    | CCCTCGATCGTTACGAACCCGGAACCGCAACGTGG<br>AAATCGAAACGCCAGGAAGAACAGACCAACTTCATCAGTT |
| KO STPBP3 FW     | GGCGTTTTGCGTGTAGGCTGGAGCTGCTTC                                                  |
| KO STPBP3 RV     | CCGCCCATGATGGCACCAAATACCGGCGCGGAAACGGCGC<br>CGCCGTAGTAATTCCGGGGATCCGTCGACC      |
| pbp3 flanking FW | GATCCGTCCCAAGAAAATATTGTAG                                                       |
| pbp3 flanking RV | AGCCACCCACGGAGCAAGAAGGTCG                                                       |
| pAC FW           | CGGCCCTCATTCGTGCGCTCTAGGA                                                       |
| pAC-sec          | CATAATGGGGAAGGCCATCCAG                                                          |
| KO PBP3* Fw      | GGGCGCTAAAGGGCGCAAGTGTAACGCGAATTGCGCCCCG<br>GGAAAATCCTGTGTAGGCTGGAGCTGCTTC      |
| KO PBP3* Rv      | CCGTTTCCCGTTAAATCAATCACCTGAAAAATGATTCGGCT<br>GGAGATCAGATTCCGGGGATCCGTCGACC      |
| FLAG-3*-FW       | TCTGGTGATGCATGGCAGCCACGTTGCGGTTCCGGGTTCCG<br>ACTACAAAGACCATGACGG                |
| FLAG-3*-Rv       | GGGCGCAAGTGTAACGCGAATTGCGCCCCGGGAAAATCCT<br>CATATGAATATCCTCCTTAG                |
| FLAG STM 1836 Fw | GGCAGCTTTGGTATCTACCGTCC                                                         |
| FL-3* FW         | TGGCGCTGTGGACATATAACG                                                           |
| FL-3* RV         | GCCTCAGATATAAAGCCTCGCT                                                          |
